# Supplementary material
Source: bioRxiv or medRxiv preprint supplement (https://medrxiv.org/content/medrxiv/early/2021/05/29/2021.05.20.21257552/DC1/embed/media-1.pdf)

Supplemental Figure 1

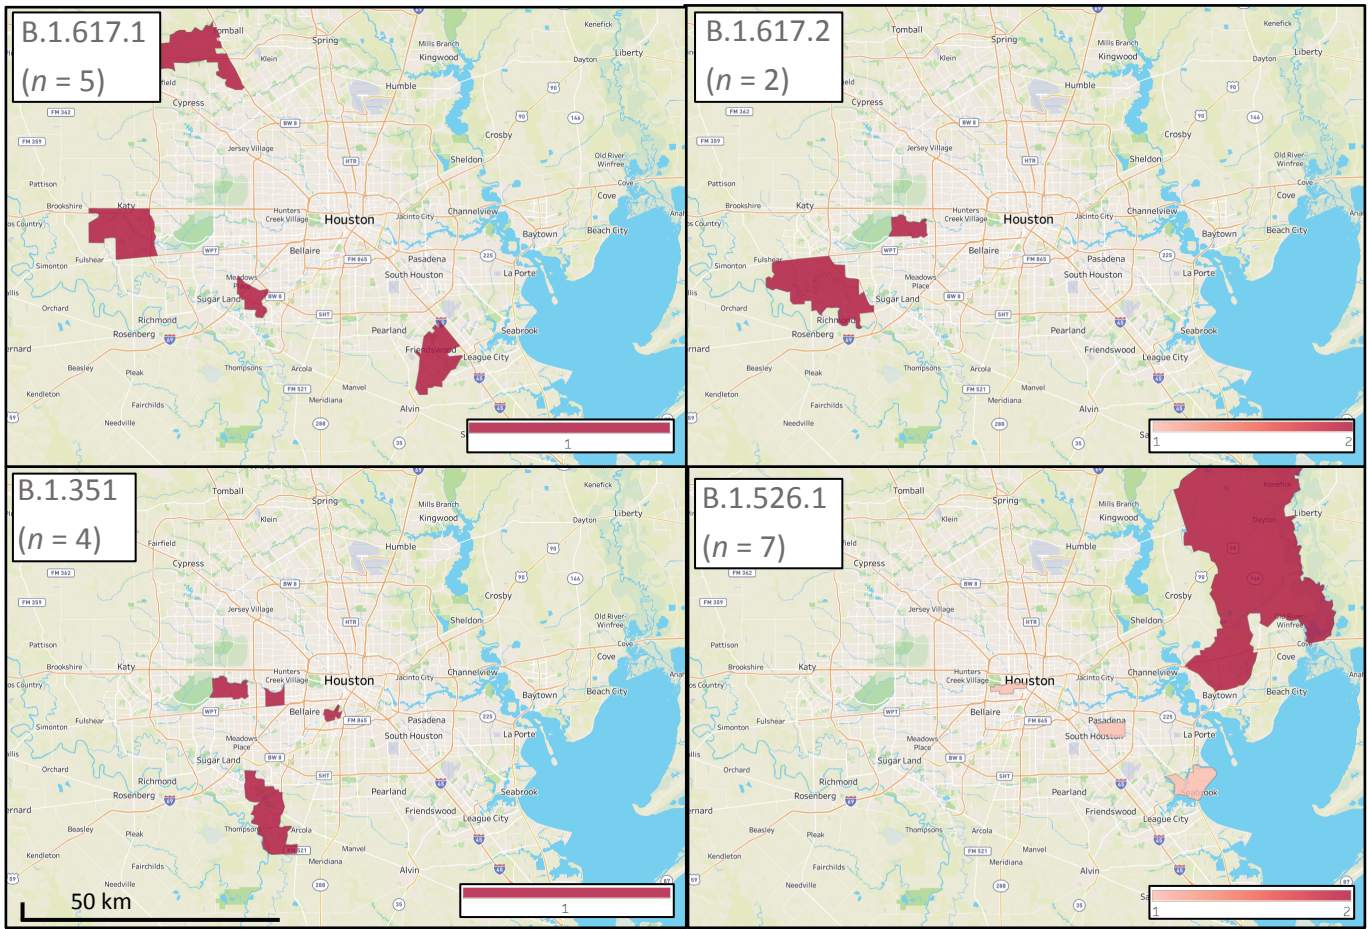

Supplemental Figure 2

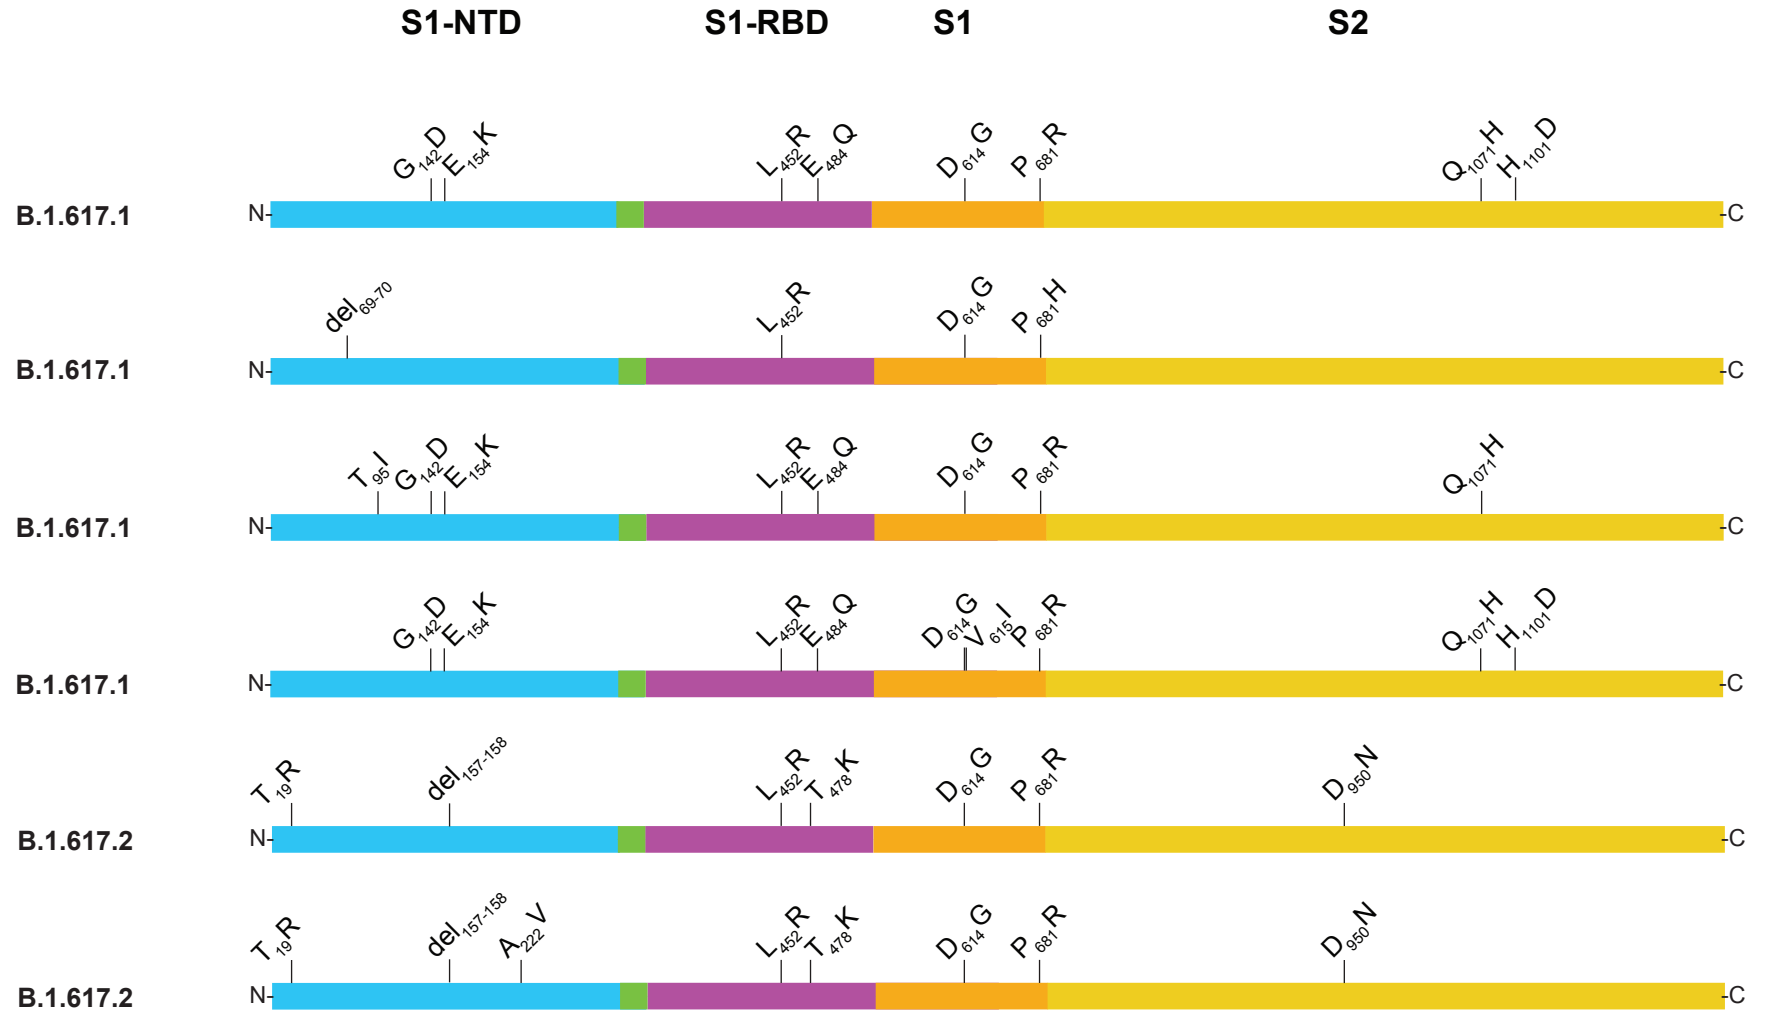

Supplement: Supplementary file [file media-1.pdf]
